# Supplementary material for: Mitral valve prolapse morphofunctional features by cardiovascular magnetic resonance: more than just a valvular disease
Source: Springer Nature journal article supplement (doi:10.1186/s12968-021-00800-w), 2021-03-01

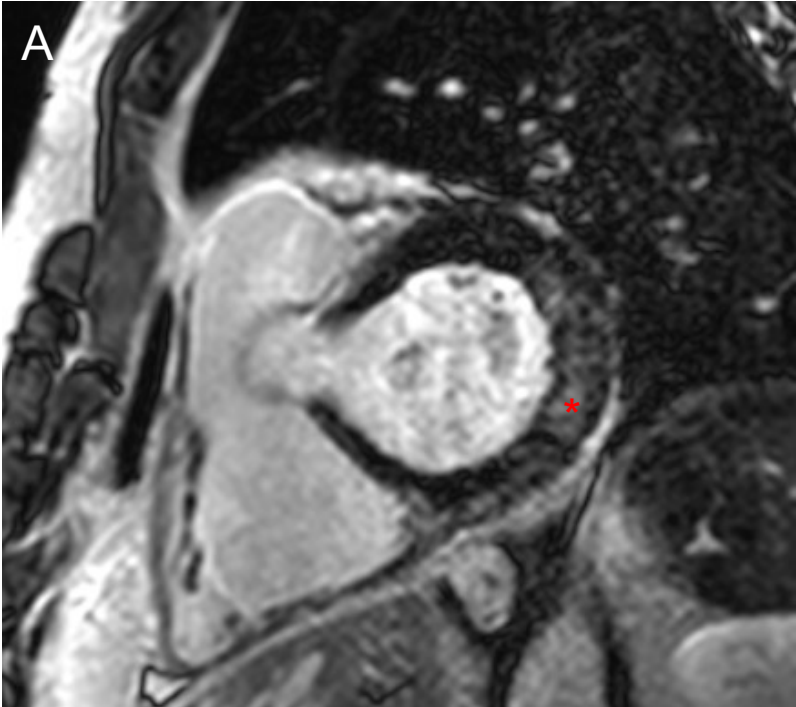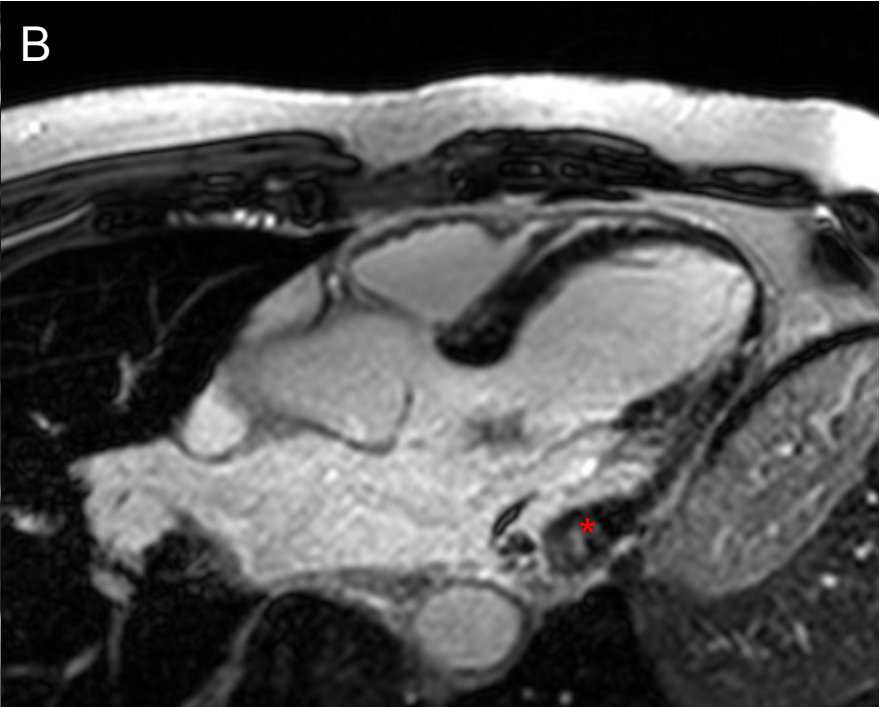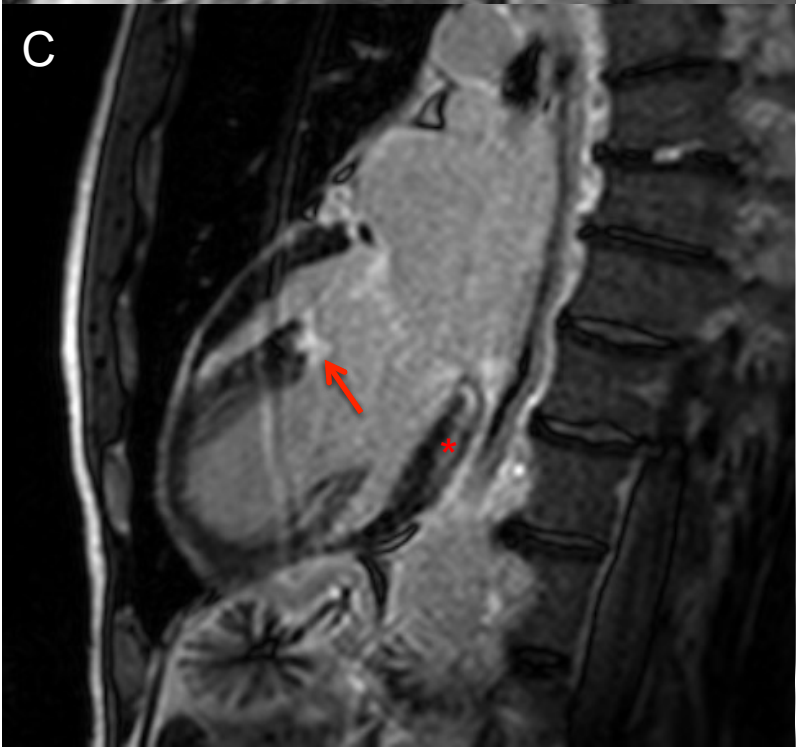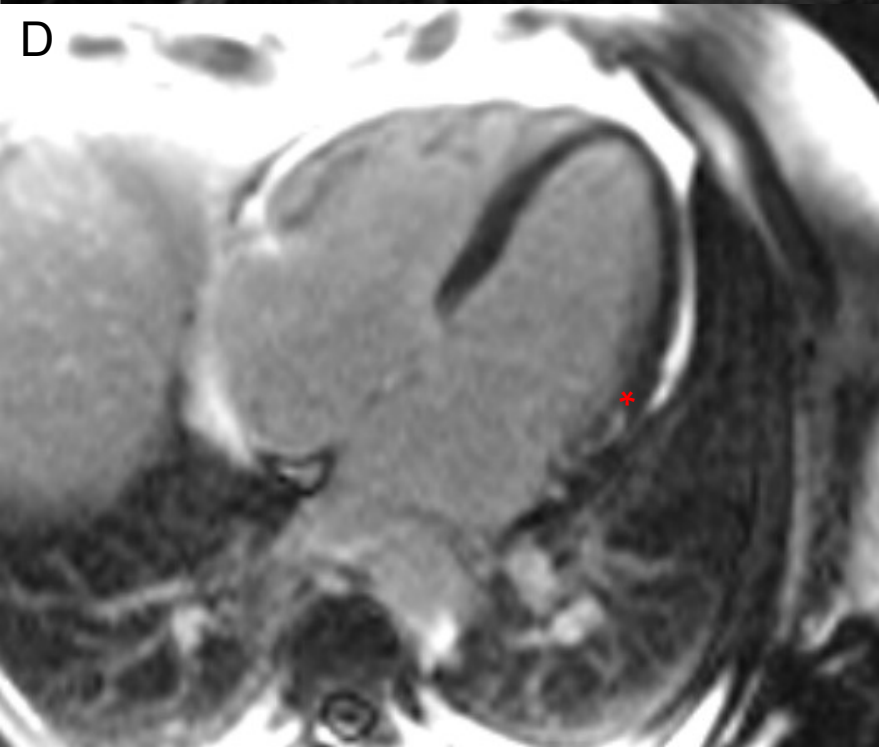

Supplement: MOESM3 [file 19744352]
